# Supplementary material for: Glutathione S-Transferase Omega 1 Activity Is Sufficient to Suppress Neurodegeneration in a Drosophila Model of Parkinson Disease
Source: PubMed Central journal article supplement — J Biol Chem. 2012 Jan 4;287(9):6628–41. doi: 10.1074/jbc.M111.291179 (PMC3307323; doi:10.1074/jbc.m111.291179), 2012-01-04

## Supporting Information

### Glutathione S-Transferase Omega 1 Activity is Sufficient to Suppress Neurodegeneration in a *Drosophila* Model of Parkinson's Disease

Kiyoung Kim, Song-Hee Kim, Jaekwang Kim, Heuijong Kim, and Jeongbin Yim

FIGURE S1. **Generation of *DmGSTO1* mutants in *Drosophila*.** *A*, Genomic structures of *DmGSTO1* (CG6673). Transposon insertion sites are indicated above the map by an inverted triangle. The GE26508 P-element was imprecisely excised to generate *DmGSTO1<sup>null</sup>*. *DmGSTO1<sup>null</sup>* was a 593 bp deletion, which removed the *DmGSTO1*, and CG6662 coding regions. *DmGSTO1* codes for two transcripts, A and B, which share the first exon. *B*, Quantitative RT-PCR analysis on extracts from mutant and control flies. *DmGSTO1<sup>null</sup>* mutants showed loss of the two transcripts (*DmGSTO1A* and *DmGSTO1B*), and CG6662. *GAPDH* was used as a control. *C*, GSH-dependent DHA reductase activity in wild type and *DmGSTO1<sup>null</sup>*. Error bars indicate standard deviation. The experimental significance was determined by one-way ANOVA (\* is  $P < 0.0001$ ). Experiments were performed in triplicate. *D*, CG6776 and CG6662 mRNA levels in *park<sup>1</sup>* mutants are the same as in *WT*. *GAPDH* was used as a control.

FIGURE S2. ***DmGSTO1* suppresses the defective thorax, and downturned wing phenotypes of *park<sup>1</sup>* mutants.** *A* and *B*, Upregulation of *DmGSTO1A* suppressed the collapsed thorax (white arrows), and downturned wing phenotypes of *parkin* mutant flies.

FIGURE S3. ***Park<sup>1</sup>* mutants display accumulation of tubulin in DA neurons.** Immunostaining with anti- $\alpha$ -tubulin, and anti-TH antibodies in DA neurons in *Drosophila* brains. Accumulation of  $\alpha$ -tubulin was observed in DA neurons from *park<sup>1</sup>* mutants and *park<sup>1</sup>/DmGSTO1<sup>null</sup>* double mutants (white arrowheads). Immunostaining with anti-TH antibody was performed to identify DA neurons.

FIGURE S4. **CG6662, another GSTO in *Drosophila*, was unable to rescue glutathionylation of the ATP synthase  $\beta$  subunit in *park<sup>1</sup>* mutants.** Glutathionylated proteins were immunoprecipitated from thorax extracts with an anti-GSH antibody, and were immunoblotted with an anti-ATPsyn  $\beta$  antibody. CG6662 was unable to glutathionylate the endogenous ATP synthase  $\beta$  subunit in *park<sup>1</sup>* mutants. Experiments were performed in triplicate.

FIGURE S5. **Mitochondrial F1F0-ATP synthase (Complex V) assembly in the ATP synthase  $\beta$  subunit RNAi mutants.** Mitochondrial protein extracts from the thorax were subjected to BlueNative-PAGE, followed by western blot analysis with anti-ATPsyn  $\alpha$  subunit antibody. All bands were decreased in the ATP synthase  $\beta$  subunit RNAi mutants. Prohibitin was used as a mitochondrial loading control.

**FIGURE S6. DmGSTO1A is not important for the suppression of mitochondrial morphological defects in *park<sup>1</sup>* mutants.** Mitochondria in flight muscle were stained with Alexa 488-conjugated streptavidin. Compared with *WT*, *park<sup>1</sup>* mutants displayed large clumps of intense signal. Upregulation of DmGSTO1A in *park<sup>1</sup>* mutants did not suppress either the *park<sup>1</sup>* mutant phenotype or the mitochondrial morphological defects (first panel). *ATP synthase  $\beta$  subunit* RNAi mutants also displayed normal mitochondrial morphology (second panel). Mitochondria in IFM tissues of *Drosophila* thorax were labeled by *mito-GFP*. Compared with *park<sup>1</sup>* mutant, DmGSTO1A or DmGSTO1A<sup>C31A</sup> expressing lines in a *park<sup>1</sup>* mutant background also showed mitochondrial morphological defects (third panel).

**FIGURE S7. The endogenous levels of the glutathionylated form of the ATP synthase  $\beta$  subunit in thorax extracts were decreased in *PINK1<sup>B9</sup>* mutants.** *A*, *parkin* and *DmGSTO1* mRNA levels were also reduced in the *PINK1<sup>B9</sup>* mutants. Error bars represent standard deviation. Experimental significance was determined by one-way ANOVA (\* is  $P < 0.05$ ). Experiments were performed in triplicate. *B*, The levels of the glutathionylated ATP synthase  $\beta$  subunit in thorax extracts were decreased in *PINK1<sup>B9</sup>* mutants. The total level of the ATP synthase  $\beta$  subunit was unchanged in *PINK1<sup>B9</sup>* mutants.  $\beta$ -actin was used as a loading control.

# FIGURE S1.

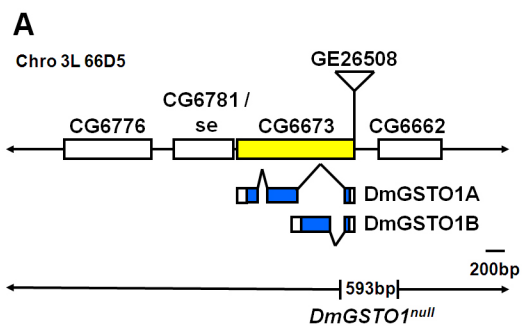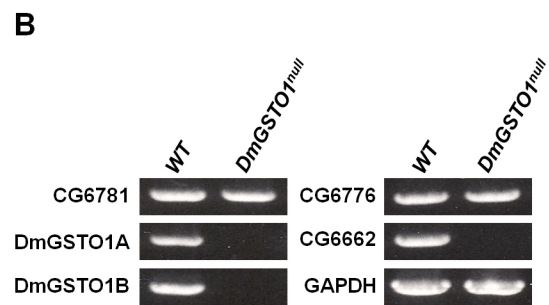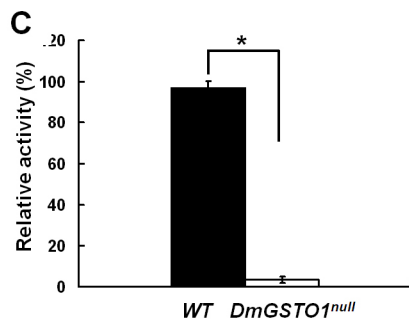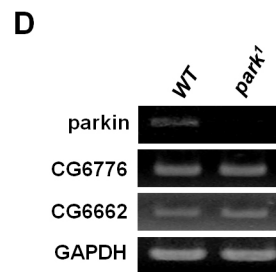

FIGURE S2.

A

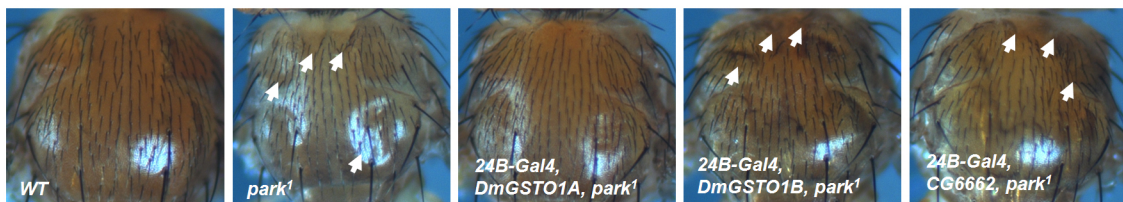

B

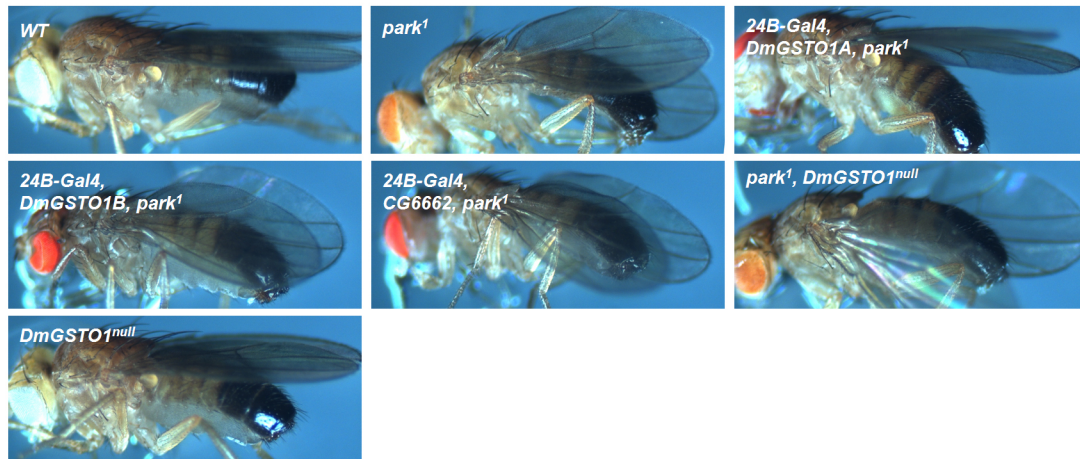

FIGURE S3.

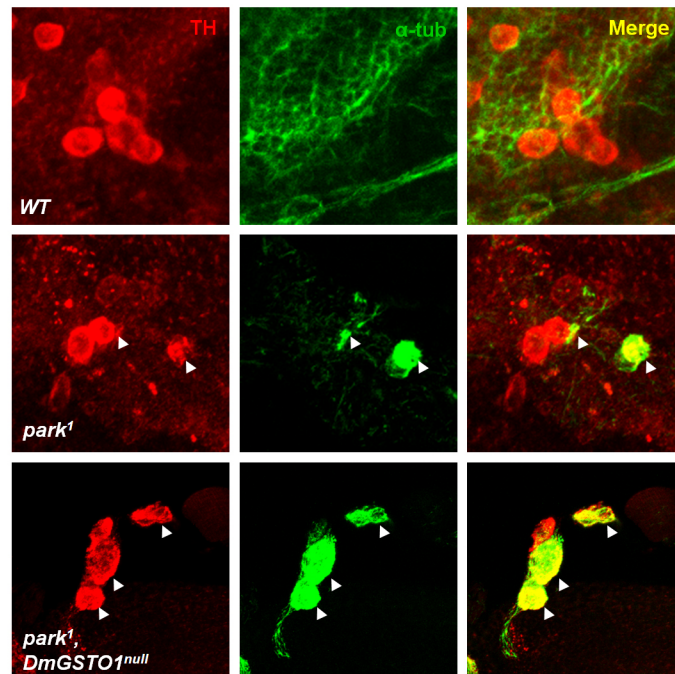

FIGURE S4.

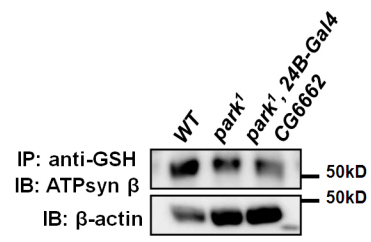

FIGURE S5.

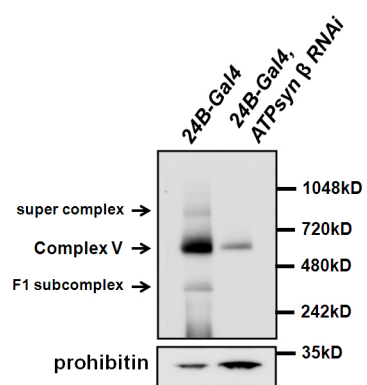

FIGURE S6.

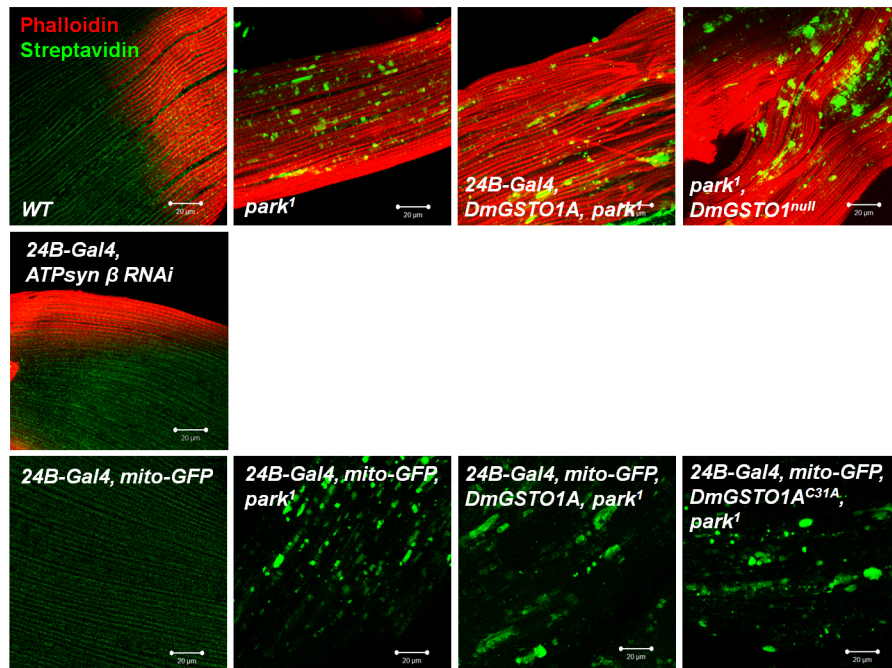



FIGURE S7.

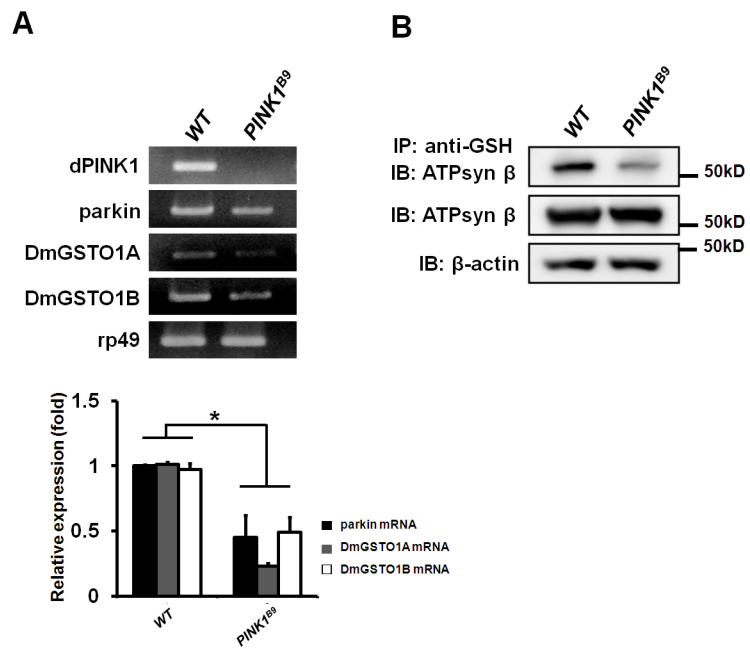

Supplement: supp_M111.291179_jbc.M111.291179-1.pdf [file supp_M111.291179_jbc.M111.291179-1.pdf]
